# Cbx4 regulates the proliferation of thymic epithelial cells and thymus function

Bo Liu<sup>1,2,\*</sup>, Yuan-Feng Liu<sup>1,\*</sup>, Ya-Rui Du<sup>2</sup>, Andrei N. Mardaryev<sup>4</sup>, Wei Yang<sup>3</sup>, Hui Chen<sup>2</sup>, Zhi-Mei Xu<sup>2</sup>, Chen-Qi Xu<sup>3</sup>, Xiao-Ren Zhang<sup>5</sup>, Vladimir A. Botchkarev<sup>4,6</sup>, Yu Zhang<sup>1,†</sup> and Guo-Liang Xu<sup>2,†</sup>

## SUMMARY

Thymic epithelial cells (TECs) are the main component of the thymic stroma, which supports T-cell proliferation and repertoire selection. Here, we demonstrate that Cbx4, a Polycomb protein that is highly expressed in the thymic epithelium, has an essential and non-redundant role in thymic organogenesis. Targeted disruption of Cbx4 causes severe hypoplasia of the fetal thymus as a result of reduced thymocyte proliferation. Cell-specific deletion of Cbx4 shows that the compromised thymopoiesis is rooted in a defective epithelial compartment. Cbx4-deficient TECs exhibit impaired proliferative capacity, and the limited thymic epithelial architecture quickly deteriorates in postnatal mutant mice, leading to an almost complete blockade of T-cell development shortly after birth and markedly reduced peripheral T-cell populations in adult mice. Furthermore, we show that Cbx4 physically interacts and functionally correlates with p63, which is a transcriptional regulator that is proposed to be important for the maintenance of the stemness of epithelial progenitors. Together, these data establish Cbx4 as a crucial regulator for the generation and maintenance of the thymic epithelium and, hence, for thymocyte development.

**KEY WORDS:** Thymic epithelial cell, Cbx4, Thymic hypoplasia, T-lymphopoiesis, p63 (Trp63), Polycomb, Epithelial progenitor

## INTRODUCTION

The thymus is the site of T lymphopoiesis. The unique role of the thymus in the establishment and maintenance of the T-cell arm of the immune system is intimately linked to specialized functions of thymic stromal cells and the thymus architecture (Rodewald, 2008; Heng et al., 2010). The major component of the thymic stroma is epithelial cells (TECs), which have a crucial role in T lymphopoiesis by generating unique microenvironmental niches that support T-cell proliferation, differentiation and repertoire selection (Petrie and Zúñiga-Pflücker, 2007; Gordon and Manley, 2011; Koch and Radtke, 2011). Both the number and proliferative status of TECs are crucial for thymopoiesis. The active proliferation of TECs, such as in young animals or CyclinD1 transgenic mice, is accompanied by enhanced thymocyte production (Klug et al., 2000), whereas the reduced proliferation of TECs in aged mice results in decreased thymic output (Gray et al., 2006). Although epithelial cellularity is closely related to thymic function, the regulation of TEC proliferation is poorly understood.

Cbx4 (chromobox homolog 4) is a member of the Polycomb group (PcG) family. The PcG proteins form two main multimeric protein complexes, termed Polycomb repressive complex (PRC) 1 and PRC2. By maintaining the repressed state of target genes

through histone modification, these proteins have a crucial role in the epigenetic regulation of cell proliferation and differentiation (Liu et al., 2006; Schwartz and Pirrotta, 2008; Ezhkova et al., 2009). Cbx proteins, including Cbx2, Cbx4, Cbx6, Cbx7 and Cbx8, are an important constituent of the PRC1 complex. Recent studies have suggested that different PRC1 subsets, as defined by specific Cbx components, may exert distinct cellular functions (Surface et al., 2010; Luis et al., 2011). However, the function of each Cbx protein in cell proliferation and differentiation remains unknown. Among the five Cbx proteins, we identified Cbx4 as the most abundant in the thymic epithelium (data not shown), which leads us to hypothesize that Cbx4 has a unique role in regulating TEC development.

Although several PcG proteins have been identified as epigenetic regulators of the immune system, most of them function during hematopoiesis or intrinsic to the developing thymocytes, rather than modulating the thymic stromal function. For example, Bmi1-deficient mice are born with a fully differentiated and functional hematopoietic system, but the hematopoiesis fails within 30 days owing to exhaustion of proliferative HSCs (Park et al., 2003). Reduced thymocyte production was reported in the absence of Cbx2, and the defect in the *Cbx2*<sup>-/-</sup> thymus is rooted in the developing thymocytes themselves, as indicated by the poor reconstitution of T-cell development in the wild-type thymus with *Cbx2*<sup>-/-</sup> fetal liver cells (Coré et al., 1997). In this article, we provide evidence that Cbx4 modulates T lymphopoiesis by regulating the proliferation of TECs and the maintenance of the thymic epithelium, thus demonstrating a novel regulatory mechanism for PcG proteins in the immune system.

## MATERIALS AND METHODS

### Gene targeting and mice

For the disruption of *Cbx4* gene, the N-terminal region of the *Cbx4* gene including the first two exons and a 0.9 kb upstream region was targeted. Targeted ES clones (MPI-II, 129Sv/Pas derived) were identified by Southern blotting, and C57BL/6J blastocytes were used for microinjection. The *Neo* cassette in the heterozygous was removed by crossed with Actin-

<sup>1</sup>Department of Immunology and Key Laboratory of Medical Immunology of Ministry of Public Health, Peking University Health Science Center, Beijing 100191, China.

<sup>2</sup>The State Key Laboratory of Molecular Biology, <sup>3</sup>The State Key Laboratory of Molecular Cell Biology, Institute of Biochemistry and Cell Biology, Chinese Academy of Sciences, Shanghai 200031, China. <sup>4</sup>Centre for Skin Sciences, University of Bradford, Bradford BD7 1DP, UK. <sup>5</sup>Institute of Health Sciences, Shanghai Institutes for Biological Sciences, Chinese Academy of Sciences and Shanghai Jiao Tong University School of Medicine, Shanghai 200025, China. <sup>6</sup>Department of Dermatology, Boston University School of Medicine, Boston, MA 02118, USA.

\*These authors contributed equally to this work.

†Author for correspondence (glxu@sibcb.ac.cn; zhangyu007@bjmu.edu.cn)

Flp mice. E11a-Cre, Foxn1-Cre or Lck-Cre mice were used for global or conditional knockout, and the mice were bred on the C57BL/6J-129Sv genetic background. The conditional knockout *p63*-deficient mice were purchased from the Jackson Laboratory (Bar Harbor, ME, USA). The experimental procedures for the use and care of animals were approved by the Ethics Committees of Peking University Health Science Center and the Shanghai Institutes for Biological Sciences, Chinese Academy of Sciences and by Home Office Project Licence (University of Bradford, UK).

### Antibodies

The Cbx4 polyclonal antibody against amino acids 363-551 was raised in rabbits and affinity purified as described previously (Ge et al., 2004). The monoclonal antibody was prepared by immunizing mice with the recombinant protein encompassing amino acids 144-362. Injections, hybridoma production, screening, and antibody production and purification were carried out as described previously (Choi and Dreyfuss, 1984). The monoclonal anti-Flag (F3165), anti-tubulin (T6199) and anti-HA (H9658) were from Sigma. Anti-Gapdh (KC-5G4) was from KangChen Biotech. Fluorochrome-labeled antibodies against CD4 (11-0041-85, 24-0041-81), CD8 (12-0081-83), B220 (11-0452), Ter119 (12-5921), Aire (51-5934-80) and CD3 (11-0031-82) were from eBioscience. Fluorochrome-labeled antibodies against CD44 (553133), CD25 (553866),  $\gamma\delta$ TCR (553177), CD45 (559864), streptavidin (554061), biotin-labeled Ly51 (553159) and the antibody specific for CD31 (550274) were from BD Pharmingen. Anti-pan-CK (628601) anti- $\Delta$ Np63 (619002) and fluorochrome-labeled anti-EpCAM (118216), B220 (103235), CD44 (103028), CD25 (102027), CD45 (103105), Kit (105805) and CD24 (101813) were from Biolegend. Anti-cytokeratin 5 was from Covance. Anti-cytokeratin 8 and anti-Meca32 were from Developmental Studies Hybridoma Bank. Anti-CD205 (MCA949) was from AbD serotec, anti-p63 (H-137) was from Santa-Cruz Biotechnology, anti-claudin 1 (37-4900) was from Zymed, anti-Ki67 was from Novacastra and anti-Cre (69050-3) was from Novagen.

### Histology, immunofluorescence microscopy and morphometry

Embryos were processed for histological analysis as described previously (Kaufman and Adams, 1954). Tissues for immunofluorescence were embedded in OCT and frozen immediately in liquid nitrogen. Sections were fixed for 10 minutes in 4% PFA, washed in PBS and blocked in 2% BSA, 10% goat serum, 0.1% Tween-20 and 0.1%  $\text{NaN}_3$  in PBS. Subsequently, sections were sequentially incubated with primary and fluorochrome-labeled secondary antibodies. After DAPI staining, sections were mounted with mounting gel (Invitrogen), and images of stained sections were captured using a Leica TCS SP2 laser confocal microscope. The percentage of Cbx4<sup>high</sup> cells in cryosections of the E16.5 thymi of *p63*<sup>-/-</sup> and wild-type mice ( $n=3$  for each strain) was calculated relative to the total number of DAPI-positive cells, and the statistical analysis was performed using Student's *t*-test as described previously (Mardaryev et al., 2011).

### Flow cytometry analysis

Freshly isolated thymocytes were stained with fluorochrome-labeled antibodies and were analyzed on a FACSCalibur, FACSARIAII or LSRFortessa using either Cellquest (BD Biosciences) or FlowJo (Tree Star, OR) software.

### BrdU incorporation

Pregnant mice were injected intraperitoneally with 5-bromo-2-deoxyuridine (BrdU; Sigma; 0.1 mg/g) and were sacrificed 1-2 hours after injection. To detect incorporated BrdU in frozen sections, samples were first treated with 2 N HCl for 30 minutes at 37°C to denature DNA followed by neutralization with 0.1 M sodium borate ( $\text{Na}_2\text{B}_4\text{O}_7$ , pH 8.5) for 15 minutes at room temperature. After treatment with 0.5% Tween-20 for 20 minutes, sections were incubated with an anti-BrdU mAb (Sigma) and goat-anti-mouse Alexa Fluor 488 (Molecular Probes) sequentially, and images were captured using a confocal microscope. For flow cytometry analysis, single-cell suspensions were prepared from the fetal thymi of BrdU pulse-labeled embryos. Cells were incubated with CD4, CD8, CD44 and CD25 antibodies followed by BrdU staining using the FITC BrdU Flow Kit (BD Pharmingen).

### RNA extraction and quantitative real-time PCR

Total RNA from fresh thymi or thymic lobes depleted of thymocytes using 2'-deoxyguanosine treatment was purified using Trizol reagent (Invitrogen) or an RNeasy Plus Micro Kit (QIAGEN), and cDNA was synthesized using the SuperScript III First-Strand RT System (Invitrogen). The expression levels of the genes of interest were measured by quantitative real-time PCR using SYBR green (Biotium). The relative levels of the transcripts were calculated by first normalizing to a housekeeping gene ( $\beta$ -actin or Gapdh) and then to control samples using the  $2^{-\Delta\Delta\text{CT}}$  method. Primers are listed in supplementary material Table S1.

### Immunoprecipitation

Whole-cell extracts was prepared from HEK-293T 36 hours after transfection with pFlag-CMV2-Cbx4 and pcDNA3-HA- $\Delta$ Np63 $\alpha$  using lysis buffer [20 mM Tris-HCl (pH 7.4), 150 mM NaCl, 0.1% (v/v) NP-40, 1  $\mu\text{g}/\text{ml}$  leupeptin, 1  $\mu\text{g}/\text{ml}$  aprotinin and 1 mM PMSF]. Immunoprecipitation of Cbx4 and p63 was carried out as previously described (Li et al., 2007). The immuno-complex was resolved on a SDS-PAGE and probed with appropriate antibodies.

### Fetal thymic organ culture

Fetal thymic organ culture (FTOC) was carried out as previously described (Jenkinson et al., 1992). Briefly, thymic lobes were prepared from E14.5 embryos and were cultured *in vitro* for 5 days in the presence of 1.35 mM 2'-deoxyguanosine (Sigma). CD24<sup>lo</sup>Kit<sup>+</sup> hematopoietic progenitor cells (HPCs) were sorted from E13.5-E15.5 fetal livers using a BD FACS Aria flow cytometer, and the purity of the harvested cells was >97% upon reanalysis by flow cytometry. Each thymic lobe was mixed with 4000 HPCs and was cultured in a hanging drop in Terasaki plates for up to 2 days. After further culture on an Isopore membrane, thymic lobes were collected, and cells within each lobe were counted and analyzed using the BD FACSCalibur platform.

### Statistical analysis

Prism software (GraphPad) was used for all statistical analysis. Datasets were compared using a *t*-test, and error bars indicate s.e.m.

## RESULTS

### Loss of Cbx4 leads to thymic hypoplasia

We prepared antibodies specific for Cbx4, validated their specificity (supplementary material Fig. S1A), and then examined Cbx4 expression in mouse tissues. Western blot analysis demonstrated high levels of Cbx4 in the brain, lung and thymus of newborn mice (supplementary material Fig. S1B). To investigate the physiological function of Cbx4, we generated Cbx4-deficient mice by targeting the first two exons of the *Cbx4* gene (supplementary material Fig. S2A). Homologous recombination was confirmed using Southern blot analysis (supplementary material Fig. S2B), and the null allele was gained upon Cre-*loxP* excision by crossing mice carrying the floxed allele with E11a-Cre transgenic mice (supplementary material Fig. S2C,D).

Heterozygous mice were grossly normal in morphology and growth. The homozygous pups were born alive at an expected Mendelian ratio but died within 1 hour of birth. Notably, all mutant pups suffered from thymic hypogenesis (Fig. 1A). The numbers of both total thymic cells and TECs (CD45<sup>hi</sup>-EpCAM<sup>hi</sup>) in *Cbx4*<sup>-/-</sup> mice at E17.5 were decreased by over 85% in comparison with wild-type littermates (Fig. 1B). The hypoplastic thymus did not appear to be the consequence of a general hematopoietic defect because the number of total splenocytes and bone marrow cells in the homozygous pups was comparable with that of the wild-type littermates. To explore the timing of the thymic developmental defect, we performed a histological assessment of the thymus and adjacent structures in E12.5-E15.5

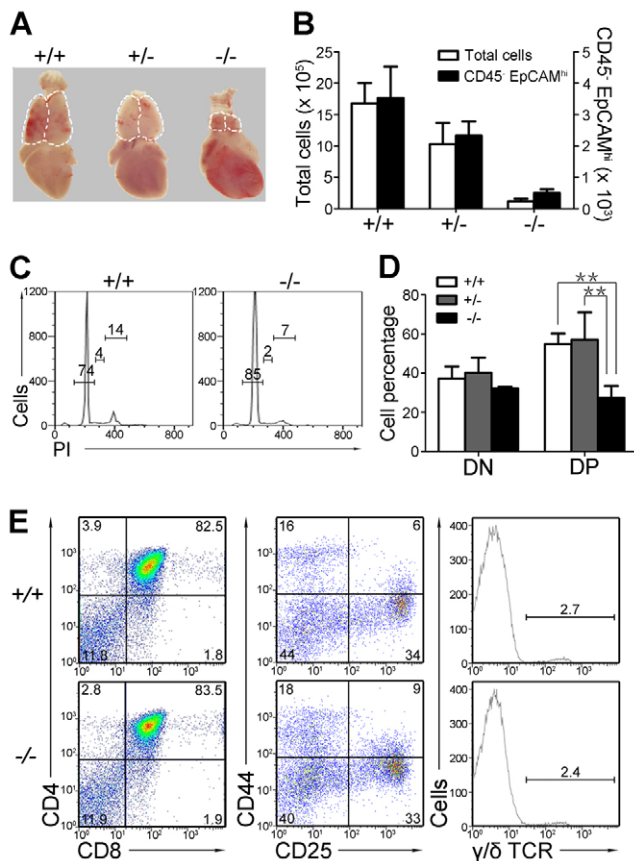

**Fig. 1. Neonatal thymic hypoplasia in *Cbx4*-deficient mice.**

(A) Gross morphology of thymi from wild-type (+/+), heterozygous (+/-) and homozygous (-/-) mutant newborn mice. (B) Numbers of total viable cells and TECs in one E17.5 thymic lobe. Absolute numbers of TECs (CD45<sup>+</sup>EpCAM<sup>hi</sup>) were calculated as (cell frequency × total number of thymic cells). The data are presented as the mean ± s.d. of five thymi. Different scales are used for total versus the epithelial cells. (C) Altered cell cycle of thymocytes in *Cbx4*-deficient thymi. The DNA content for individual E17.5 thymocytes was measured by PI staining. Numbers, from left to right, indicate the percentages of cells in G0/G1, S and G2/M phases, respectively. (D) Quantification of BrdU-positive cells in the DN and DP subsets of E16.5 thymi. After BrdU labeling for 2 hours, thymic cells were prepared from embryos and the percentage of BrdU-positive cells within each subset was determined by flow cytometry. \*\**P* < 0.01. Data are mean ± s.e.m. (E) Representation of different subpopulations in fetal thymi. Thymocytes from E17.5 embryos were analyzed by flow cytometry using T-cell surface markers as indicated. The numbers given are the percentages of various subpopulations.

embryos (supplementary material Fig. S3A). In *Cbx4*-deficient embryos, the separation of the ultimobranchial body rudiments and thymic lobes from the pharynx proceeded normally. However, the growth of the mutant thymus was severely retarded after E13.5, while the wild-type thymus underwent rapid expansion. Therefore, *Cbx4* deficiency mainly targeted the late development of the fetal thymus rather than the initiation of organogenesis. Besides, similar expression patterns of CD31 in the mutant and wild-type fetal thymi indicate that *Cbx4* is not essential for the formation of thymic vasculature (supplementary material Fig. S3B,C).

### ***Cbx4* deficiency impairs the proliferation of fetal thymocytes**

To elucidate the cellular basis of the thymic hypoplasia caused by *Cbx4* deficiency, we examined whether there was any defect in the survival and proliferation of thymic cells. We performed the TUNEL assay using E17.5 thymic sections. The proportion of apoptotic cells to total thymic cells was low and comparable in the wild-type and mutant thymus (data not shown). Alternatively, flow cytometric analysis of propidium iodide (PI)-stained E17.5 thymocytes showed an increased proportion of cells in the G0/G1 phase but reduced cell numbers in the S and G2/M phases in the knockout mice (Fig. 1C). The proliferation of thymocytes *in vivo* during embryogenesis was further examined by *in utero* bromodeoxyuridine (BrdU) labeling. Although there were similar percentages of BrdU<sup>+</sup> cells within the CD4<sup>-</sup>CD8<sup>-</sup> double-negative (DN) cells in wild-type and knockout thymi, the BrdU<sup>+</sup> fraction in the CD4<sup>+</sup>CD8<sup>+</sup> double-positive (DP) thymocytes was reduced by 50% in the deficient animals (Fig. 1D). Because DP thymocytes constitute the majority of the thymic cell population in late embryonic development, impaired proliferation of DP cells might directly contribute to the thymic hypoplasia observed in *Cbx4*<sup>-/-</sup> mice.

Despite sharply reduced absolute cell numbers, the *Cbx4*<sup>-/-</sup> thymus displayed a normal profile of DN and DP, as well as CD4<sup>+</sup> and CD8<sup>+</sup> single-positive (SP) cells at E17.5 (Fig. 1E, left). Furthermore, the percentage of thymocytes in each of the four DN subsets defined by CD44 and CD25 expression in wild-type and *Cbx4*<sup>-/-</sup> thymi was comparable (Fig. 1E, middle). Moreover, the TCRγδ<sup>+</sup> population in the *Cbx4*<sup>-/-</sup> thymus was intact (Fig. 1E, right). These results indicate that the progression of thymocyte differentiation during the perinatal stages is not affected by the loss of *Cbx4*.

### **Thymic hypocellularity results from a thymic epithelial cell defect**

The thymic abnormality in *Cbx4*-deficient mice could be the consequence of either an intrinsic defect of the hematopoietic progenitors or the dysfunction of the thymic stroma. To distinguish between these two possibilities, we performed a detailed analysis of the thymic cells expressing *Cbx4*. Thymocytes, which make up the majority of thymic mass, expressed little *Cbx4*, as determined by western blot analysis of purified cells (data not shown). Instead, high levels of *Cbx4* protein were detected in the thymic stroma, specifically in epithelial cells that were positive for either cytokeratin 5 (K5; Krt5 – Mouse Genome Informatics) or cytokeratin 8 (K8; Krt8 – Mouse Genome Informatics) (Fig. 2A). Other thymic components, including endothelial cells (supplementary material Fig. S4) and the mesenchyme ensheathing the developing thymus (data not shown), showed no *Cbx4* expression.

To elucidate the contribution of TECs to the observed thymic defect in *Cbx4*<sup>-/-</sup> mice, reconstituted fetal thymic organ culture (RFTOC) was performed. Fetal thymi with differing genotypes were pretreated with 2'-deoxyguanosine to eliminate hematopoietic cells and were then reconstituted with hematopoietic progenitor cells (HPCs) purified from the E15.5 fetal livers of wild-type or *Cbx4*<sup>-/-</sup> embryos (supplementary material Fig. S5A). Similar numbers of HPCs were obtained, suggesting that early hematopoiesis was not affected by the absence of *Cbx4* (supplementary material Fig. S5B). After 12 days of culture, comparable numbers of thymocytes were generated in the wild-type thymic lobes reconstituted with either wild-type or *Cbx4*-

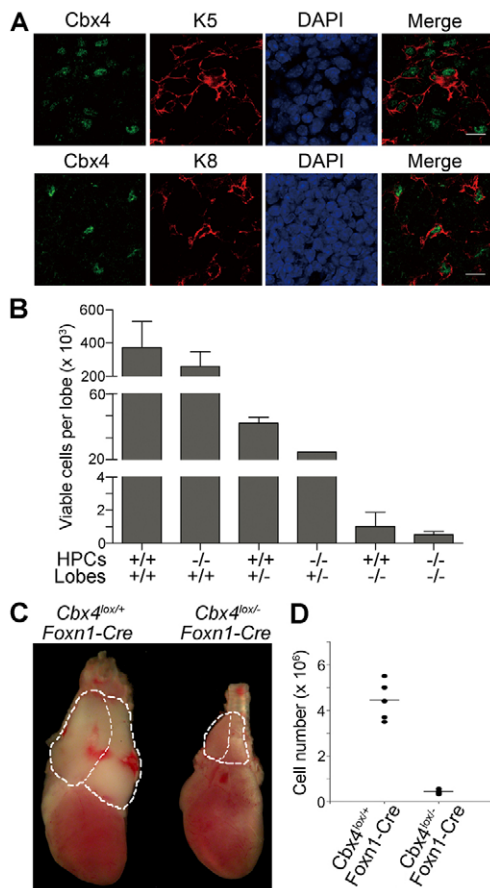

**Fig. 2. Thymic hypoplasia results from a defective TEC compartment.** (A) Immunostaining of the thymus for Cbx4. Frozen sections of E17.5 fetal thymus were co-stained with antibodies against Cbx4 (green) and the medullary epithelial marker K5 or the cortical epithelial marker K8 (red). Scale bars: 10  $\mu$ m. (B) Cell yield from fetal thymic organ cultures following reconstitution with hematopoietic progenitor cells. *Cbx4*<sup>+/+</sup>, *Cbx4*<sup>+/-</sup> or *Cbx4*<sup>-/-</sup> fetal thymi were treated with 2'-deoxyguanosine for 5 days to eliminate hematopoietic cells and then reconstituted with CD24<sup>lo</sup>Kit<sup>+</sup> cells from *Cbx4*<sup>+/+</sup> or *Cbx4*<sup>-/-</sup> fetal livers. The numbers of viable cells recovered from 12-day culture are presented as mean  $\pm$  s.e.m. ( $n \geq 3$ ). (C) Gross appearance of thymi with the TEC-specific disruption of Cbx4. Representative images of thymi from [*Cbx4*<sup>lox/+</sup>, Foxn1-Cre] and [*Cbx4*<sup>lox/-</sup>, Foxn1-Cre] newborn mice are shown. (D) The total number of thymocytes in [*Cbx4*<sup>lox/+</sup>, Foxn1-Cre] versus [*Cbx4*<sup>lox/-</sup>, Foxn1-Cre] (right) newborn mice. Each dot represents an individual sample and horizontal bars denote the mean ( $n \geq 5$ ).

deficient HPCs. By contrast, thymocytes were barely detectable in the *Cbx4*<sup>-/-</sup> lobes regardless of whether the lobes were reconstituted with wild-type or mutant HPCs (Fig. 2B). Therefore, Cbx4 deficiency primarily affects the thymic stromal compartment.

This conclusion was validated in studies using mice with cell-specific deletion of Cbx4. *Cbx4*-floxed mice were cross-bred with Lck-Cre mice (Pan et al., 2002) to specifically disrupt *Cbx4* in the T-cell lineage. Such mice had a normal number of thymocytes (supplementary material Fig. S6). Furthermore, TEC-specific *Cbx4* deletion was achieved by cross-breeding with Foxn1-Cre mice, in which Cre is expressed in the TECs from early in thymic organogenesis. Similar to the thymic phenotype of *Cbx4* global knockout mice, [*Cbx4*<sup>lox/-</sup>, Foxn1-Cre] mice also suffered severe

thymic atrophy (Fig. 2C,D). Taken together, these results suggest an essential role for Cbx4 in the proper functioning of TECs, which support the expansion of thymic cellularity during embryonic development.

### TEC proliferation and maturation is impaired by disruption of Cbx4

Having attributed the defect in the Cbx4-deficient thymus to the epithelial cells, we focused our subsequent analysis on the TEC compartment. Similar percentages of K5<sup>+</sup> and K8<sup>+</sup> cells were detected among nucleated cells in the thymi of E18.5 [*Cbx4*<sup>lox/+</sup>, Foxn1-Cre] and [*Cbx4*<sup>lox/-</sup>, Foxn1-Cre] mice (Fig. 3C-F). This, as well as the result shown in Fig. 1B, indicated that the reduced total thymic cellularity was accompanied by a proportional decrease of the epithelial compartment. We next examined the proliferation status of the TEC populations. Immunostaining revealed equal percentages of Ki67<sup>+</sup> cells in the p63<sup>+</sup> (Trp63 – Mouse Genome Informatics) population of control and mutant thymi at E18.5 (Fig. 3A,B), indicating that the proliferation of the putative TEC progenitors is independent of Cbx4. By contrast, the proportion of Ki67<sup>+</sup> cells in either the K5<sup>+</sup> or K8<sup>+</sup> population in the mutant thymus was approximately half of that found in the control animals (Fig. 3C-F), which is suggestive of impaired proliferation of the developing epithelial cells.

In addition to cell proliferation, TEC differentiation was examined using the transcription factor p63 as a marker for putative epithelial progenitors and claudin 1 as a marker for terminally differentiated TECs (Langbein et al., 2003; Senoo et al., 2007). More than 40% of the nucleated cells were found to be positive for p63 in the fetal thymi of both [*Cbx4*<sup>lox/+</sup>, Foxn1-Cre] and [*Cbx4*<sup>lox/-</sup>, Foxn1-Cre] embryos at E13.5 (Fig. 4A). The p63<sup>+</sup> population quickly dropped to 2-3% in the control thymus at E18.5, but was maintained at a relatively high level (7-9%) in the mutant thymus (Fig. 4B,C). In contrast to the relative increase of p63<sup>+</sup> cells, the number of claudin 1<sup>+</sup> cells in the mutant thymus was decreased by as much as 80% in comparison with the control thymus at E18.5 (Fig. 4B,C). Consistent with this, quantitative RT-PCR revealed a much elevated level of K14 mRNA, whereas CD80 and CD86 expression was found to be decreased (Fig. 4D). Furthermore, immunostaining demonstrated dramatically reduced numbers of Aire<sup>+</sup>, UEA-1<sup>+</sup> and CD205<sup>+</sup> cells, suggesting impaired maturation of both medullary and cortical TECs (mTECs and cTECs) (Fig. 4E-H). Together, these results demonstrate that Cbx4 is crucial both for the proliferation and maturation of TECs.

### Cbx4 is required for the maintenance of the thymic epithelium and T-cell differentiation in postnatal mice

Despite the reduced thymic cellularity, the overall architecture of the thymic epithelium was preserved, and both medullary and cortical epithelial cells were present in the Cbx4-deficient thymus at E18.5 (supplementary material Fig. S3D), indicating that Cbx4 is not required for the generation of thymic epithelial progenitors and their subsequent bifurcation into the medullary and cortical lineages during embryonic development. This is in contrast to the defect in *nude* mice, which manifests as a developmental block of the epithelium at the initial stage (Blackburn et al., 1996).

Intriguingly, the limited, but morphologically intact, thymic epithelial architecture formed during embryogenesis quickly deteriorates in postnatal [*Cbx4*<sup>lox/-</sup>, Foxn1-Cre] mice. Immunostaining showed that the discrete cortical and medullary structures were no longer observable in 3-week-old mutant mice

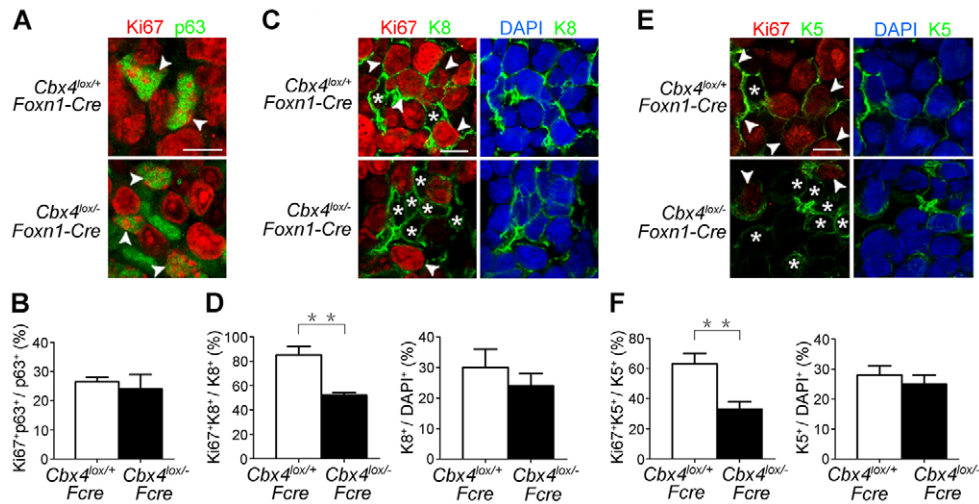

**Fig. 3. Proliferation of TECs is impaired in the absence of Cbx4.** (A) Proliferation of p63<sup>+</sup> cells in E18.5 [*Cbx4<sup>lox/+</sup>, Foxn1-Cre*] and [*Cbx4<sup>lox/-</sup>, Foxn1-Cre*] thymi. Thymic sections were stained for p63 and the proliferation marker Ki67. Scale bars: 5  $\mu$ m. Arrowheads indicate the Ki67<sup>+</sup>p63<sup>+</sup> cells. (B) Percentage of proliferative p63<sup>+</sup> cells in E18.5 thymi. The experiments were performed at least three times and over 600 p63<sup>+</sup> cells were counted for each genotype. Data are mean $\pm$ s.e.m. (C) Proliferation of K8<sup>+</sup> cells in E18.5 thymi. Thymic sections were stained for Ki67 and the cTEC marker K8 with counterstaining of the nuclei by DAPI. Asterisks indicate quiescent cTECs, whereas proliferating cTECs are indicated by arrowheads. (D) Percentage of total and proliferative cTECs in E18.5 thymi. The percentage of total cTECs is defined as the proportion of K8<sup>+</sup> cells within DAPI-stained cells, and the percentage of proliferative cTECs is the ratio of Ki67<sup>+</sup> cells within K8<sup>+</sup> cells. The experiments were performed at least three times. Over 2000 total cells or 500 K8<sup>+</sup> cells were counted for each genotype. \*\**P*<0.01; *n* $\geq$ 3. Data are mean $\pm$ s.e.m. (E) Proliferation of K5<sup>+</sup> cells in E18.5 thymi. Experiments were performed as in C using K5 as an mTEC marker. Scale bars: 5  $\mu$ m. Arrows and arrowheads indicate quiescent and proliferating mTECs, respectively. (F) Percentage of total and proliferative mTECs in E18.5 thymi calculated as in D. Experiments were performed at least three times. Over 1500 total cells or 500 K5<sup>+</sup> cells were counted for each genotype. \*\**P*<0.01; *n* $\geq$ 3. Data are mean $\pm$ s.e.m.

(Fig. 5A,B). Moreover, the majority of the remaining epithelial cells at this stage stained positive for both K5 and K8, which was in contrast to the large number of K5 or K8 single-positive cells in the control thymus.

The TEC defect eventually led to severely disturbed T-cell development. In comparison with the largely normal flow cytometry profile of thymocytes at E17.5, DP cells were markedly reduced in proportion in thymi of [*Cbx4<sup>lox/-</sup>, Foxn1-Cre*] mice at 3 weeks after birth (Fig. 5C, upper). The seemingly overrepresented DN population in the mutant was primarily composed of B220<sup>+</sup> B lineage cells instead of T lineage precursors (Fig. 5C bottom; supplementary material Fig. S7A,C). Nevertheless, the absolute number of B lineage cells was not significantly increased compared with that in control thymi (supplementary material Fig. S7D), which removed the possibility of ectopic B cell development in the thymus in the absence of Cbx4. Further analysis of the DN population indicated that the majority of the DN1-like CD44<sup>+</sup>CD25<sup>-</sup> cells in the mutant thymus (Fig. 5C, middle) were actually B lineage cells (supplementary material Fig. S7A,C), whereas the few remaining DN4-like CD44<sup>-</sup>CD25<sup>-</sup> cells mostly originated from non-hematopoietic contamination (supplementary material Fig. S7B). By 6 weeks after birth, the DP cells could barely be detected in the mutant mice (data not shown). Consistent with deteriorating thymic function, the T-cell compartment in the periphery was never fully established in adult mice, as indicated by the small CD3<sup>+</sup> population in the spleen of 6-week-old [*Cbx4<sup>lox/-</sup>, Foxn1-Cre*] mice (Fig. 5D). Therefore, in addition to regulating the proliferation and maturation of TECs during embryogenesis, Cbx4 has an even more crucial role in the maintenance of the thymic epithelium in postnatal animals. The Cbx4 deficiency eventually results in a loss of capacity for supporting T lymphopoiesis.

### Cbx4-deficiency is associated with dysregulated expression of key molecules in the thymic stroma

We next investigated the expression of multiple molecules that are crucially involved in the regulation of TEC development and function in E14.5 fetal thymi depleted of hematopoietic cells following treatment with 2'-deoxyguanosine. As shown in Fig. 6A, Cbx4 deficiency resulted in significantly reduced expression of *Fgf7* and *Fgf10*, whereas *FgfR2-IIIb* mRNA levels were not altered. As far as the BMP pathway was concerned, Cbx4-deficient thymic stromal cells showed enhanced expression of *Bmp4*, whereas *Bmp2*, BMP receptors and regulators of BMP signaling, such as *Tsg*, *Noggin* and *Chordin*, were expressed at levels comparable with those in the wild-type mice (Fig. 6B). T-cell migration within the thymus, which is primarily driven by the coordinated expression of multiple chemokines, is essential for their differentiation. In the absence of Cbx4, the transcription of a number of chemokines, including *Ccl19*, *Ccl25*, *Cxcl10*, *Cxcl11* and *Cxcl12*, is repressed (Fig. 6C). These results indicate an overt dysregulation of the TEC compartment at the molecular level owing to Cbx4 disruption.

### Cbx4 physically interacts and functionally correlates with the transcription factor p63

To explore the molecular mechanism underlying Cbx4 function in TECs, yeast two-hybrid assays were performed, leading to the identification of several candidate interacting partners for Cbx4. Among them,  $\Delta$ Np63 was of particular interest because it is known to be crucial for the proliferation of epithelial stem cells (Fig. 7A). In fact, the thymic defect observed in Cbx4-deficient mice in many ways mimics the defect in *p63*<sup>-/-</sup> mice. To verify the interaction between Cbx4 and p63, we co-transfected Flag-tagged Cbx4 and

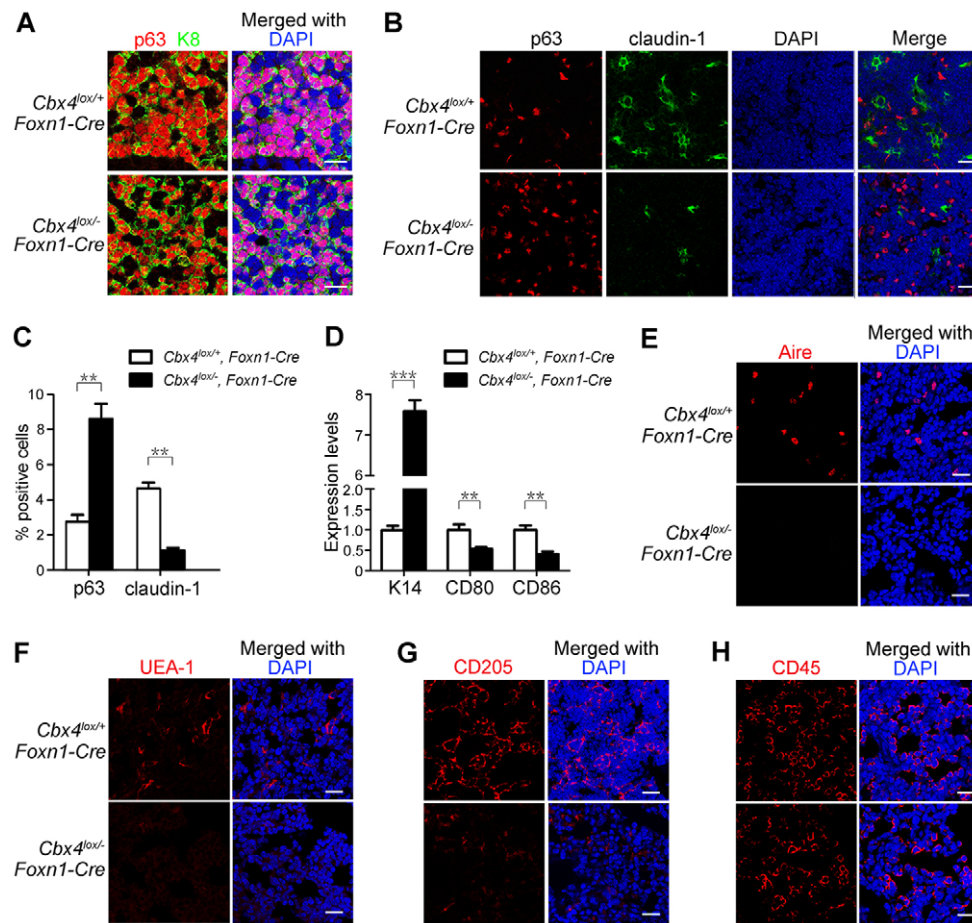

**Fig. 4. Reduced proportion of mature TECs in the *Cbx4*-deficient thymus.** (A) Representative images showing comparable percentages of p63<sup>+</sup> cells in E13.5 [*Cbx4<sup>lox/+</sup>, Foxn1-Cre*] and [*Cbx4<sup>lox/-</sup>, Foxn1-Cre*] thymi. Thymic sections were stained for p63 (red) and K8 (green). Scale bars: 10  $\mu$ m. (B) Representative images of p63- (red) or claudin 1 (green)-positive cells in [*Cbx4<sup>lox/+</sup>, Foxn1-Cre*] and [*Cbx4<sup>lox/-</sup>, Foxn1-Cre*] fetal thymi at E18.5, as determined by immunofluorescent staining. Scale bars: 10  $\mu$ m. (C) Percentage of p63- or claudin 1-positive cells within DAPI-stained cells. The experiments were performed at least three times and over 1000 cells were counted for each genotype. \*\* $P < 0.01$ ;  $n \geq 4$ . Data are mean  $\pm$  s.e.m. (D) Expression of TEC differentiation markers in E17.5 thymi analyzed by RT-qPCR. \*\* $P < 0.01$ ; \*\*\* $P < 0.001$ ;  $n \geq 3$ . Data are mean  $\pm$  s.e.m. (E-H) Immunostaining of TEC differentiation markers in [*Cbx4<sup>lox/-</sup>, Foxn1-Cre*] thymi and littermate controls from 2-week-old pups, using CD45 as a control. Scale bars: 10  $\mu$ m.

HA-tagged p63 into 293T cells and conducted co-immunoprecipitation assays. As shown in Fig. 7B,C, p63 was detected in the immune complex that was precipitated with anti-Cbx4, and vice versa. We next examined the expression patterns of these two molecules in the thymus by immunostaining. The Cbx4 signal was found to match perfectly with that of p63 in the thymus (Fig. 7D). This co-localization suggests that these two proteins may be functionally related. In support of this conclusion, the number of Cbx4<sup>high</sup> cells in E16.5 *p63*<sup>-/-</sup> thymi was reduced by ~80% compared with the wild-type thymus (Fig. 7E,F). This observation, in combination with the relative accumulation of p63<sup>+</sup> cells in the *Cbx4*<sup>-/-</sup> thymi, suggests that Cbx4 is a downstream factor of p63 that regulates TEC development.

## DISCUSSION

### Unique functions of Cbx proteins

Several PcG proteins have been shown to participate in the regulation of hematopoiesis and T-cell differentiation (Sauvageau and Sauvageau, 2010). However, as shown in the present study, the underlying mechanism of Cbx4 function is different from that of other PcG proteins. Thymocyte development failed to be reconstituted in the *Cbx4*<sup>-/-</sup> fetal thymus with wild-type hematopoietic progenitors. Similarly, thymic hypocellularity was reproduced following the tissue-specific deletion of *Cbx4* gene in the epithelium but not in the thymocyte. Therefore, Cbx4 deficiency primarily affects the epithelial compartment, and reduced thymocyte production is a secondary effect.

Previous studies have revealed that different Cbx-associated PRC1 complexes exert unique functions throughout development.

*Cbx2*-deficient mice display homeotic transformations of the axial skeleton (Coré et al., 1997), and mice deficient for both the *Cbx2* and *Bmi1* show stronger homeotic phenotypes (Bel et al., 1998), indicating that *Cbx2* might synergistically regulate mesodermal genes. In contrast to *Cbx2*, the present study reveals the potentially unique role of *Cbx4* in epithelial development. This hypothesis is also supported by the results of another study in which *Cbx4* was shown to regulate epidermal stem cell differentiation and senescence (Luis et al., 2011). One recent study alternatively suggests that the maintenance of embryonic stem cell pluripotency might primarily depend on *Cbx7* (Morey et al., 2012).

### Functional correlations between Cbx4 and p63 in thymic development

In many aspects, the thymic phenotype of the *Cbx4*<sup>-/-</sup> mice resembles that of the *p63*<sup>-/-</sup> mice (Candi et al., 2007; Senoo et al., 2007). First, both lines exhibit unusual thymic hypoplasia with greatly reduced production but normal maturation of fetal thymocytes. Second, the proliferation of developing epithelial cells is severely compromised in both cases. Last, and most importantly, the two mutant lines share a common defect in the maintenance of the thymic epithelium. In *p63*<sup>-/-</sup> mice, the failure has been suggested to be due to an impaired proliferative potential of the epithelial stem cells, which leads to their premature proliferative exhaustion (Senoo et al., 2007). Notably, *Cbx4* colocalizes with p63 in a subset of TECs. Moreover, we demonstrated that there was a relative accumulation of p63<sup>+</sup> cells in the *Cbx4*-deficient thymus (Fig. 4C), whereas the *p63*-deficient thymus contained fewer *Cbx4*<sup>+</sup> cells (Fig. 7F). The latter observation is consistent with a

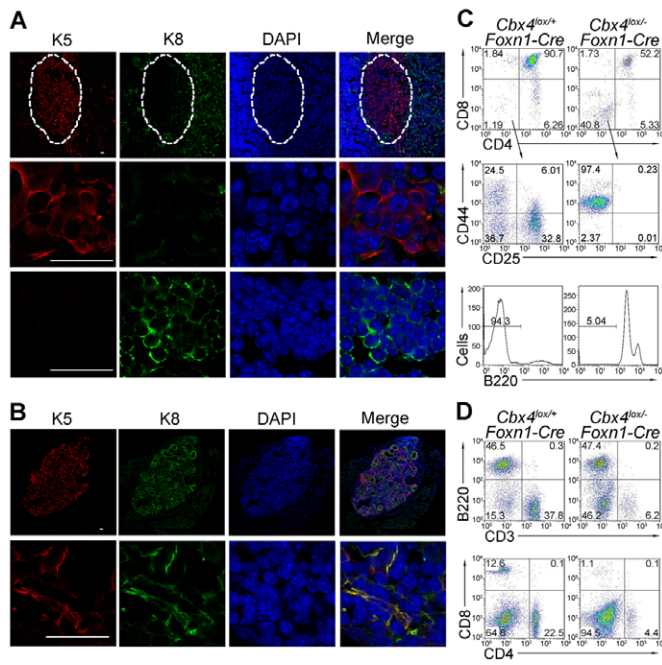

**Fig. 5. Cbx4 is required for the maintenance of the thymic epithelium and T-cell differentiation in postnatal mice.**

(A) Immunostaining of the thymus from 3-week-old [*Cbx4<sup>lox/+</sup>*, *Foxn1-Cre*] mice. The dotted circles in the top panels indicate the cortico-medullary junction. Representative images of the medulla are shown in the middle panels, and the cortex is shown in the bottom panels. Scale bars: 50  $\mu$ m. (B) Immunostaining of the thymus from 3-week-old [*Cbx4<sup>lox/-</sup>*, *Foxn1-Cre*] mice. Thymic sections were stained for K5 and K8. Scale bars: 50  $\mu$ m. (C) Flow cytometry analysis of thymocytes from 3-week-old [*Cbx4<sup>lox/+</sup>*, *Foxn1-Cre*] mice and littermate controls. CD4/CD8 staining of total thymocytes is shown on the top. After gating on *Ter119<sup>-</sup>* cells, the DN population were stained for CD25/CD44 (middle) and B220 (bottom). The numbers given are percentages of the indicated subpopulations. (D) Flow cytometry analysis of splenocytes from 6-week-old [*Cbx4<sup>lox/-</sup>*, *Foxn1-Cre*] mice and littermate controls. A representative profile of B220/CD3 (top) and CD4/CD8 (bottom) is shown. The number in each quadrant indicates the percentage of the specific subset.

recent report of decreased *Cbx4* transcription in the skin of *p63<sup>-/-</sup>* mice (Fessing et al., 2011). These data support the theory *Cbx4* and *p63* may function in the same pathway to promote the proliferative and self-renewal activities of thymic epithelial stem cells. Specifically, *Cbx4* may act downstream of *p63*. This speculation, however, seems to be at odds with the observed physical interaction between *Cbx4* and *p63*. One explanation could be that *Cbx4*, once induced by *p63*, may be recruited into the *p63* complex to regulate its own expression via a feedback mechanism. Alternatively, the complex formed between *p63* and *Cbx4* is required for the transcriptional regulation of downstream targets.

### Downstream molecular events of *Cbx4*

The downstream molecular events leading to the thymic defect in *Cbx4<sup>-/-</sup>* mice remain to be further defined. The *Ink4a/Arf* (*Cdkn2a* – Mouse Genome Informatics) locus is one of the best-characterized targets of transcriptional repression mediated by PcG proteins (Sauvageau and Sauvageau, 2010). The *Cbx4<sup>-/-</sup>* thymus, however, showed no significant induction of *p16<sup>Ink4a</sup>* and *p19<sup>Arf</sup>* (data not shown). We also examined the expression of multiple

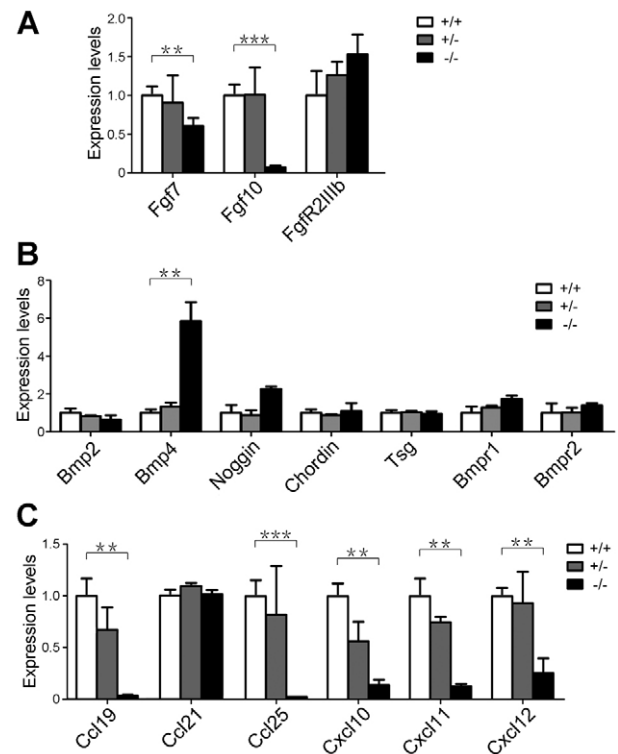

**Fig. 6. Disruption of *Cbx4* results in dysregulated expression of functionally important molecules in the thymic stroma.**

(A–C) Relative expression of FGF ligands and their receptor (A), BMP signaling-related molecules (B) and chemokines (C) in E14.5 wild-type, *Cbx4<sup>+/-</sup>* and *Cbx4<sup>-/-</sup>* fetal thymi treated with 2'-deoxyguanosine for 5 days. mRNA levels were analyzed by quantitative PCR. \*\* $P < 0.01$ ; \*\*\* $P < 0.001$ ;  $n \geq 3$ . Data are mean  $\pm$  s.e.m.

molecules that are crucially involved in the regulation of TEC development and function. Candi et al. have identified *Fgfr2-IIIb* as one of the downstream effectors of *p63* (Candi et al., 2007). We found no significant changes in *Fgfr2-IIIb* levels in the *Cbx4<sup>-/-</sup>* thymus, indicating that *Cbx4* may function in parallel to *p63*-FGFR signaling. Alternatively, *Fgf10*, which is the primary ligand of *Fgfr2-IIIb* in the thymus, was found to be markedly suppressed (Fig. 6A). Given the importance of *Fgfr2-IIIb* and *Fgf10* in thymus development (Revest et al., 2001), altered *Fgf10* expression may be partly responsible for the thymic defect observed in *Cbx4<sup>-/-</sup>* mice. Besides, the *Cbx4<sup>-/-</sup>* thymus showed substantially elevated levels of *Bmp4* (Fig. 6B), which is reported essential for thymic development (Nosaka et al., 2003; Tsai et al., 2003). The inhibitory effect of *Bmp4* on thymus development suggests that the elevated level of *Bmp4* in the *Cbx4<sup>-/-</sup>* thymus is relevant to the defect.

In addition to the signal molecules involved in the development of TECs itself, our expression analysis included those molecules that are crucial for the T-lymphopoiesis-supporting function of TECs (Ciofani and Zúñiga-Pflücker, 2007). As postnatal T-cell development was almost completely blocked in *Cbx4*-deficient mice (Fig. 5C), we examined the expression of molecules crucial for lineage commitment and the proliferation of T cell progenitors, such as Delta-like 4 (supplementary material Fig. S7E), stem cell factor and interleukin 7 (data not shown), but found no difference in their mRNA levels between the wild-type and mutant thymi. However, the mutant thymus showed reduced expression of a number of chemokines (Fig. 6C), which, we believe, may impair

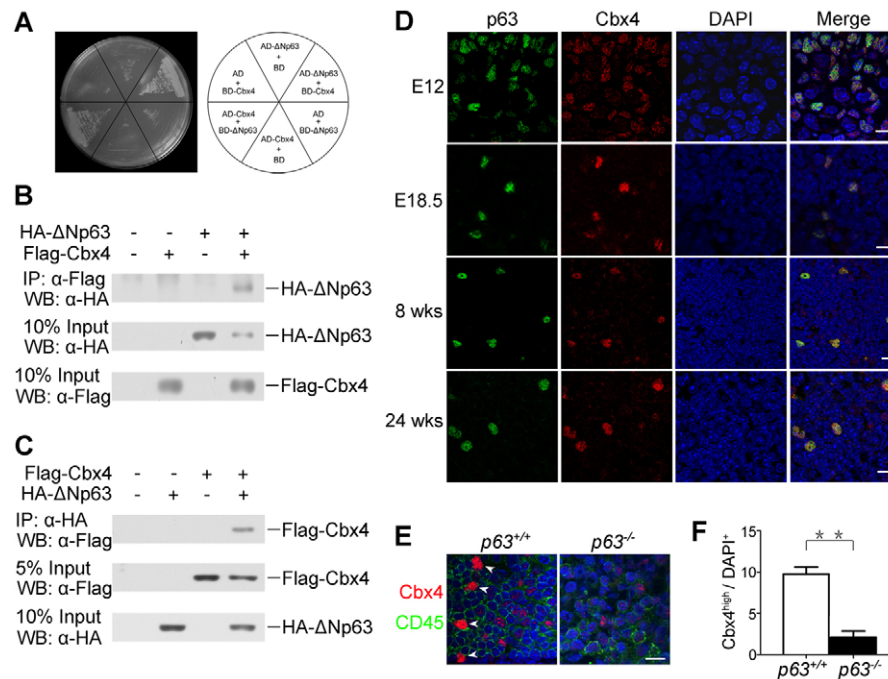

**Fig. 7. Cbx4 is regulated by p63.** (A) Interaction between Cbx4 and p63 as shown by a yeast two-hybrid system. Yeast co-transformed with GAL4BD-Cbx4 and GAL4AD-p63 was allowed to grow on SD minimal media (SD-L-T-A-H) lacking leucine, tryptophan, adenine and histidine. The yeast co-transformed with GAL4BD-p63 and GAL4AD-Cbx4 was similarly cultured. A schematic representation of the transformants is shown on the right. (B,C) Co-immunoprecipitation of p63 and Cbx4 in transfected cells. HEK 293T cells were transfected with pcDNA3-HA-p63 and pCMV-Flag-Cbx4 alone or in combination, as indicated above the figure. (B) Immunoprecipitation with anti-Flag and probing with anti-HA or anti-Flag; (C) immunoprecipitation with anti-HA and probing with anti-Flag or anti-HA. (D) Colocalization of Cbx4 and p63 in the thymus in mice at different ages, as determined by immunofluorescent staining. Scale bars: 10  $\mu$ m. (E) Cbx4 expression in *p63*<sup>-/-</sup> thymi. Thymic sections were stained for Cbx4 (red) and CD45 (green) as a control. Representative images are shown. Cbx4<sup>high</sup> cells are indicated by arrows. Scale bars: 10  $\mu$ m. (F) Quantification of Cbx4<sup>high</sup> cells in E16.5 thymi. The y axis shows the percentage of Cbx4<sup>high</sup> cells among DAPI-stained cells. Over 1500 *p63*<sup>+/+</sup> and 1000 *p63*<sup>-/-</sup> thymic cells were counted. \*\**P*<0.01; *n*≥3. Data are mean±s.e.m.

the migration of early thymic progenitors into the thymus and the directional movement of developing thymocytes. We analyzed the thymic DN1 profiles of the newborn conditional knockout mice and littermate controls by staining for Kit and CD24 (Sambandam et al., 2005). As shown in supplementary material Fig. S8, the proportion of early thymic progenitors (ETPs) was slightly reduced in the knockout thymi, which means that the absolute ETP number is significantly decreased compared with control thymi. We attempted to restore the structure and function of the *Cbx4*<sup>-/-</sup> thymus by adding various exogenous factors to the fetal thymic organ culture, but no single factor or combination of factors was able to rescue the observed hypoplasia (data not shown). Further investigation is clearly warranted to solve this puzzle.

#### Acknowledgements

We thank Dr X. Zhuang for Actin-Flpe transgenic mouse, Dr T. Boehm for the Foxn1-Cre transgenic mouse, Dr Y. Zhuang for the Lck-Cre transgenic mouse, Dr X. Liu for discussions and CDB RIKEN for the generation of *Cbx4* C-terminus knockout mouse.

#### Funding

This work was supported by grants from the Ministry of Science and Technology of China [2011CB946100]; from the National Science Foundation of China to G.-L.X. [90919061 and 81261130314] and to Y.Z. [30830091]; and from the National Institutes of Health (USA) to V.A.B. [AR049778]. Deposited in PMC for release after 12 months.

#### Competing interests statement

The authors declare no competing financial interests.

#### Supplementary material

Supplementary material available online at <http://dev.biologists.org/lookup/suppl/doi:10.1242/dev.085035/-/DC1>

#### References

- Bel, S., Coré, N., Djabali, M., Kieboom, K., Van der Lugt, N., Alkema, M. J. and Van Lohuizen, M. (1998). Genetic interactions and dosage effects of Polycomb group genes in mice. *Development* **125**, 3543-3551.
- Blackburn, C. C., Augustine, C. L., Li, R., Harvey, R. P., Malin, M. A., Boyd, R. L., Miller, J. F. and Morahan, G. (1996). The nu gene acts cell-autonomously and is required for differentiation of thymic epithelial progenitors. *Proc. Natl. Acad. Sci. USA* **93**, 5742-5746.
- Candi, E., Rufini, A., Terrinoni, A., Giamboi-Miraglia, A., Lena, A. M., Mantovani, R., Knight, R. and Melino, G. (2007). DeltaNp63 regulates thymic development through enhanced expression of FgfR2 and Jag2. *Proc. Natl. Acad. Sci. USA* **104**, 11999-12004.
- Choi, Y. D. and Dreyfuss, G. (1984). Monoclonal antibody characterization of the C proteins of heterogeneous nuclear ribonucleoprotein complexes in vertebrate cells. *J. Cell Biol.* **99**, 1997-2204.
- Ciofani, M. and Zúñiga-Pflücker, J. C. (2007). The thymus as an inductive site for T lymphopoiesis. *Annu. Rev. Cell Dev. Biol.* **23**, 463-493.
- Coré, N., Bel, S., Gaunt, S. J., Aurrand-Lions, M., Pearce, J., Fisher, A. and Djabali, M. (1997). Altered cellular proliferation and mesoderm patterning in Polycomb-M33-deficient mice. *Development* **124**, 721-729.
- Ezhkova, E., Pasolli, H. A., Parker, J. S., Stokes, N., Su, I. H., Hannon, G., Tarakhovskiy, A. and Fuchs, E. (2009). Ezh2 orchestrates gene expression for the stepwise differentiation of tissue-specific stem cells. *Cell* **136**, 1122-1135.
- Fessing, M. Y., Mardaryev, A. N., Gdula, M. R., Sharov, A. A., Sharova, T. Y., Rapisarda, V., Gordon, K. B., Smorodchenko, A. D., Poterlowicz, K., Ferone, G. et al. (2011). p63 regulates Satb1 to control tissue-specific chromatin remodeling during development of the epidermis. *J. Cell Biol.* **194**, 825-839.



- Ge, Y. Z., Pu, M. T., Gowher, H., Wu, H. P., Ding, J. P., Jeltsch, A. and Xu, G. L. (2004). Chromatin targeting of *de novo* DNA methyltransferases by the PWWP domain. *J. Biol. Chem.* **279**, 25447-25454.
- Gordon, J. and Manley, N. R. (2011). Mechanisms of thymus organogenesis and morphogenesis. *Development* **138**, 3865-3878.
- Gray, D. H., Seach, N., Ueno, T., Milton, M. K., Liston, A., Lew, A. M., Goodnow, C. C. and Boyd, R. L. (2006). Developmental kinetics, turnover, and stimulatory capacity of thymic epithelial cells. *Blood* **108**, 3777-3785.
- Heng, T. S., Chidgey, A. P. and Boyd, R. L. (2010). Getting back at nature: understanding thymic development and overcoming its atrophy. *Curr. Opin. Pharmacol.* **10**, 425-433.
- Jenkinson, E. J., Anderson, G. and Owen, J. J. (1992). Studies on T cell maturation on defined thymic stromal cell populations in vitro. *J. Exp. Med.* **176**, 845-853.
- Kaufman, H. E. and Adams, E. C. (1954). Water-soluble chelates in histochemical staining. *Science* **120**, 723-724.
- Klug, D. B., Crouch, E., Carter, C., Coghlan, L., Conti, C. J. and Richie, E. R. (2000). Transgenic expression of cyclin D1 in thymic epithelial precursors promotes epithelial and T cell development. *J. Immunol.* **164**, 1881-1888.
- Koch, U. and Radtke, F. (2011). Mechanisms of T cell development and transformation. *Annu. Rev. Cell Dev. Biol.* **27**, 539-562.
- Langbein, L., Pape, U. F., Grund, C., Kuhn, C., Praetzel, S., Moll, I., Moll, R. and Franke, W. W. (2003). Tight junction-related structures in the absence of a lumen: occludin, claudins and tight junction plaque proteins in densely packed cell formations of stratified epithelia and squamous cell carcinomas. *Eur. J. Cell Biol.* **82**, 385-400.
- Li, B., Zhou, J., Liu, P., Hu, J., Jin, H., Shimono, Y., Takahashi, M. and Xu, G. (2007). Polycomb protein Cbx4 promotes SUMO modification of *de novo* DNA methyltransferase Dnmt3a. *Biochem. J.* **405**, 369-378.
- Liu, S., Dontu, G., Mantle, I. D., Patel, S., Ahn, N. S., Jackson, K. W., Suri, P. and Wicha, M. S. (2006). Hedgehog signaling and Bmi-1 regulate self-renewal of normal and malignant human mammary stem cells. *Cancer Res.* **66**, 6063-6071.
- Luis, N. M., Morey, L., Mejetta, S., Pascual, G., Janich, P., Kuebler, B., Cozzuto, L., Roma, G., Nascimento, E., Frye, M. et al. (2011). Regulation of human epidermal stem cell proliferation and senescence requires polycomb-dependent and -independent functions of Cbx4. *Cell Stem Cell* **9**, 233-246.
- Mardaryev, A. N., Meier, N., Poterlowicz, K., Sharov, A. A., Sharova, T. Y., Ahmed, M. I., Rapisarda, V., Lewis, C., Fessing, M. Y., Ruenger, T. M. et al. (2011). Lhx2 differentially regulates Sox9, Tcf4 and Lgr5 in hair follicle stem cells to promote epidermal regeneration after injury. *Development* **138**, 4843-4852.
- Morey, L., Pascual, G., Cozzuto, L., Roma, G., Wutz, A., Benitah, S. A. and Di Croce, L. (2012). Nonoverlapping functions of the Polycomb group Cbx family of proteins in embryonic stem cells. *Cell Stem Cell* **10**, 47-62.
- Nosaka, T., Morita, S., Kitamura, H., Nakajima, H., Shibata, F., Morikawa, Y., Kataoka, Y., Ebihara, Y., Kawashima, T., Itoh, T. et al. (2003). Mammalian twisted gastrulation is essential for skeleto-lymphogenesis. *Mol. Cell Biol.* **23**, 2969-2980.
- Pan, L., Hanrahan, J., Li, J., Hale, L. P. and Zhuang, Y. (2002). An analysis of T cell intrinsic roles of E2A by conditional gene disruption in the thymus. *J. Immunol.* **168**, 3923-3932.
- Park, I. K., Qian, D., Kiel, M., Becker, M. W., Pihalja, M., Weissman, I. L., Morrison, S. J. and Clarke, M. F. (2003). Bmi-1 is required for maintenance of adult self-renewing haematopoietic stem cells. *Nature* **423**, 302-305.
- Petrie, H. T. and Zúñiga-Pflücker, J. C. (2007). Zoned out: functional mapping of stromal signaling microenvironments in the thymus. *Annu. Rev. Immunol.* **25**, 649-679.
- Revest, J. M., Suniara, R. K., Kerr, K., Owen, J. J. and Dickson, C. (2001). Development of the thymus requires signaling through the fibroblast growth factor receptor R2-IIIb. *J. Immunol.* **167**, 1954-1961.
- Rodewald, H. R. (2008). Thymus organogenesis. *Annu. Rev. Immunol.* **26**, 355-388.
- Sambandam, A., Maillard, I., Zediak, V. P., Xu, L., Gerstein, R. M., Aster, J. C., Pear, W. S. and Bhandoola, A. (2005). Notch signaling controls the generation and differentiation of early T lineage progenitors. *Nat. Immunol.* **6**, 663-670.
- Sauvageau, M. and Sauvageau, G. (2010). Polycomb group proteins: multifaceted regulators of somatic stem cells and cancer. *Cell Stem Cell* **7**, 299-313.
- Schwartz, Y. B. and Pirrotta, V. (2008). Polycomb complexes and epigenetic states. *Curr. Opin. Cell Biol.* **20**, 266-273.
- Senoo, M., Pinto, F., Crum, C. P. and McKeon, F. (2007). p63 is essential for the proliferative potential of stem cells in stratified epithelia. *Cell* **129**, 523-536.
- Surface, L. E., Thornton, S. R. and Boyer, L. A. (2010). Polycomb group proteins set the stage for early lineage commitment. *Cell Stem Cell* **7**, 288-298.
- Tsai, P. T., Lee, R. A. and Wu, H. (2003). BMP4 acts upstream of FGF in modulating thymic stroma and regulating thymopoiesis. *Blood* **102**, 3947-3953.
